# Supplementary material for: Glaciers determine the sensitivity of hydrological processes to perturbed climate in a large mountainous basin on the Tibetan Plateau
Source: Copernicus journal article supplement (doi:10.5194/hess-28-669-2024), 2024-02-15
Supplement: Supplementary file 1 [file hess-28-669-2024-supplement.zip]

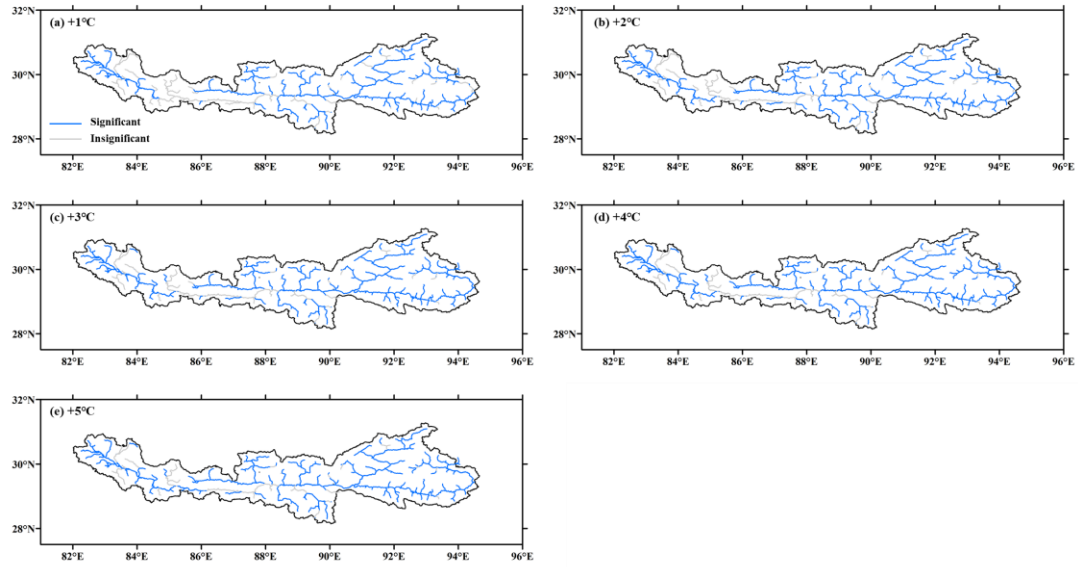

**Figure S1.** Spatial pattern of the statistical significance of REW-scale runoff change in response to warming temperature

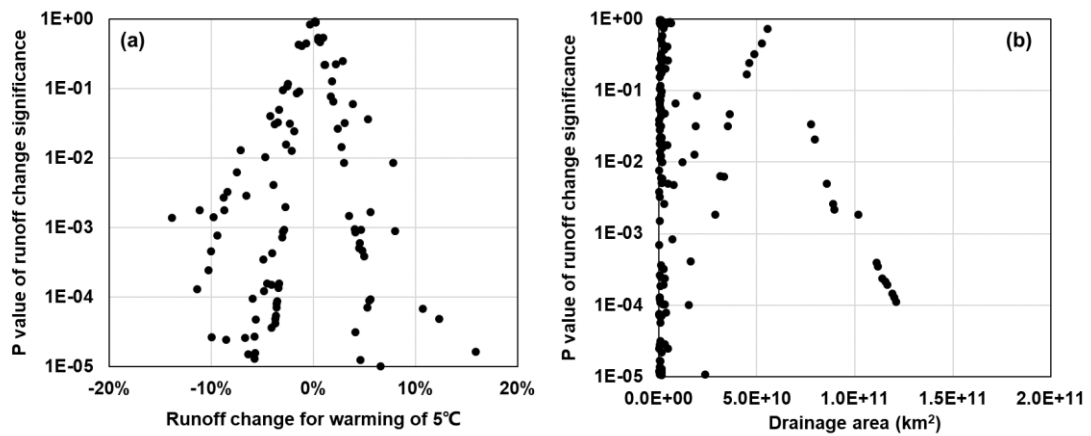

**Figure S2.** The relations between P value of runoff change significance in response to 5 °C warming and (a) runoff change for 5 °C warming and (b) drainage area

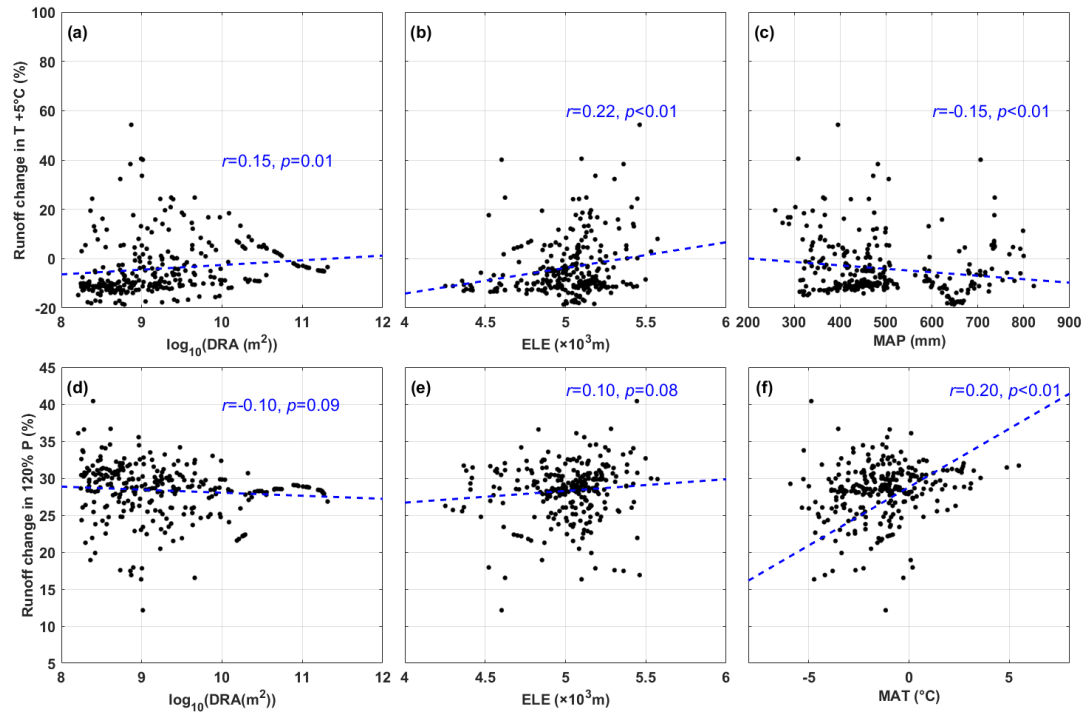

**Figure S3.** The correlations between the hydrological sensitivities to climate perturbation and the weak influence factors.
