# Supplementary material for: Glaciers determine the sensitivity of hydrological processes to perturbed climate in a large mountainous basin on the Tibetan Plateau
Source: Copernicus journal article supplement (doi:10.5194/hess-28-669-2024), 2024-02-15
Supplement: Supplementary file 1 [file Supplementary Tables.xlsx]

## Sheet: Table S1
Table S1. Sensitivities of amounts of runoff components at annual and seasonal scale in response to perturbed temperature
Season	Component	Baseline*	+1℃	+2℃	+3℃	+4℃	+5℃
Annual	Subsurface runoff	195.82 ±31.01	189.83 ±30.26	184.02 ±29.50	178.44 ±28.67	173.02 ±27.91	167.83 ±27.17
	Rainfall runoff	62.30 ±10.23	64.06 ±10.43	65.49 ±10.49	66.76 ±10.54	67.84 ±10.61	68.73 ±10.65
	Snowmelt runoff	9.30 ±2.19	8.11 ±2.15	7.10 ±2.07	6.17 ±2.00	5.35 ±1.95	4.63 ±1.90
	Glacier melt runoff	21.46 ±1.67	24.68 ±1.98	28.14 ±2.35	31.86 ±2.79	35.78 ±3.34	39.87 ±3.99
Spring	Subsurface runoff	23.02 ±1.84	23.09 ±2.10	23.02 ±2.44	22.89 ±2.79	22.67 ±3.14	22.41 ±3.46
	Rainfall runoff	5.38 ±1.57	6.43 ±1.69	7.40 ±1.75	8.29 ±1.82	9.03 ±1.86	9.64 ±1.89
	Snowmelt runoff	5.92 ±1.28	5.36 ±1.43	4.72 ±1.51	4.07 ±1.55	3.45 ±1.56	2.89 ±1.54
	Glacier melt runoff	2.45 ±0.63	3.27 ±0.77	4.21 ±0.92	5.25 ±1.06	6.38 ±1.22	7.58 ±1.39
Summer	Subsurface runoff	68.49 ±19.53	64.87 ±18.81	61.65 ±18.17	58.72 ±17.56	56.05 ±16.98	53.60 ±16.40
	Rainfall runoff	46.70 ±8.72	46.68 ±8.78	46.57 ±8.78	46.43 ±8.77	46.27 ±8.75	46.10 ±8.74
	Snowmelt runoff	0.53 ±0.51	0.25 ±0.33	0.12 ±0.21	0.05 ±0.11	0.02 ±0.05	0.01 ±0.02
	Glacier melt runoff	14.68 ±0.74	16.13 ±0.85	17.62 ±1.01	19.15 ±1.19	20.68 ±1.42	22.17 ±1.68
Autumn	Subsurface runoff	74.99 ±14.45	72.84 ±14.18	70.66 ±13.91	68.50 ±13.62	66.37 ±13.34	64.29 ±13.07
	Rainfall runoff	11.41 ±3.21	11.89 ±3.23	12.26 ±3.24	12.62 ±3.20	12.93 ±3.17	13.18 ±3.15
	Snowmelt runoff	1.16 ±0.51	1.01 ±0.49	0.89 ±0.47	0.74 ±0.43	0.58 ±0.34	0.43 ±0.25
	Glacier melt runoff	4.57 ±0.66	5.46 ±0.74	6.42 ±0.84	7.47 ±0.95	8.61 ±1.09	9.81 ±1.26
Winter	Subsurface runoff	29.44 ±1.77	29.14 ±1.77	28.80 ±1.76	28.43 ±1.74	28.02 ±1.74	27.62 ±1.73
	Rainfall runoff	0.02 ±0.02	0.03 ±0.03	0.06 ±0.04	0.10 ±0.06	0.18 ±0.09	0.28 ±0.12
	Snowmelt runoff	0.27 ±0.12	0.36 ±0.12	0.46 ±0.12	0.58 ±0.11	0.70 ±0.13	0.81 ±0.17
	Glacier melt runoff	0.01 ±0.02	0.03 ±0.03	0.06 ±0.06	0.11 ±0.11	0.21 ±0.18	0.38 ±0.28
*The results are presented in the form of “annual average value ± standard deviation”. Same for Tables S2-S4.

## Sheet: Table S2
Table S2. Sensitivities of contributions of runoff components at annual and seasonal scale in response to perturbed temperature (%)
Season	Component	Baseline	+1℃	+2℃	+3℃	+4℃	+5℃
Annual	Subsurface runoff	67.79 ±1.65	66.22 ±1.78	64.63 ±1.92	63.00 ±2.06	61.36 ±2.20	59.71 ±2.33
	Rainfall runoff	21.57 ±1.32	22.34 ±1.31	23.00 ±1.27	23.57 ±1.26	24.06 ±1.24	24.45 ±1.23
	Snowmelt runoff	3.22 ±0.88	2.83 ±0.87	2.49 ±0.84	2.18 ±0.80	1.90 ±0.77	1.65 ±0.74
	Glacier melt runoff	7.43 ±1.37	8.61 ±1.57	9.88 ±1.76	11.25 ±1.96	12.69 ±2.15	14.19 ±2.34
Spring	Subsurface runoff	62.60 ±3.36	60.51 ±3.49	58.49 ±3.67	56.52 ±3.88	54.59 ±4.11	52.69 ±4.35
	Rainfall runoff	14.64 ±3.88	16.86 ±4.06	18.81 ±4.06	20.46 ±4.05	21.75 ±3.95	22.68 ±3.83
	Snowmelt runoff	16.09 ±2.91	14.05 ±3.13	12.00 ±3.16	10.05 ±3.12	8.30 ±3.05	6.80 ±2.96
	Glacier melt runoff	6.67 ±1.93	8.58 ±2.38	10.70 ±2.83	12.97 ±3.24	15.36 ±3.67	17.83 ±4.07
Summer	Subsurface runoff	52.52 ±5.03	50.71 ±5.07	48.95 ±5.13	47.22 ±5.18	45.56 ±5.22	43.98 ±5.22
	Rainfall runoff	35.81 ±3.21	36.49 ±3.01	36.98 ±2.86	37.33 ±2.75	37.61 ±2.67	37.83 ±2.60
	Snowmelt runoff	0.41 ±0.44	0.20 ±0.30	0.09 ±0.19	0.04 ±0.10	0.02 ±0.04	0.01 ±0.02
	Glacier melt runoff	11.26 ±2.81	12.61 ±3.07	13.99 ±3.33	15.40 ±3.55	16.81 ±3.75	18.19 ±3.91
Autumn	Subsurface runoff	81.39 ±2.31	79.87 ±2.48	78.31 ±2.68	76.69 ±2.87	75.01 ±3.03	73.30 ±3.20
	Rainfall runoff	12.39 ±2.01	13.04 ±2.06	13.59 ±2.14	14.13 ±2.16	14.61 ±2.15	15.02 ±2.17
	Snowmelt runoff	1.26 ±0.50	1.11 ±0.49	0.99 ±0.48	0.82 ±0.44	0.66 ±0.36	0.49 ±0.27
	Glacier melt runoff	4.96 ±1.31	5.99 ±1.53	7.11 ±1.76	8.36 ±1.99	9.73 ±2.22	11.18 ±2.44
Winter	Subsurface runoff	98.98 ±0.52	98.58 ±0.61	98.04 ±0.71	97.28 ±0.82	96.25 ±1.00	94.91 ±1.24
	Rainfall runoff	0.05 ±0.06	0.11 ±0.10	0.19 ±0.15	0.35 ±0.22	0.61 ±0.33	0.98 ±0.44
	Snowmelt runoff	0.92 ±0.42	1.22 ±0.44	1.57 ±0.43	1.98 ±0.41	2.40 ±0.46	2.80 ±0.61
	Glacier melt runoff	0.04 ±0.06	0.09 ±0.11	0.20 ±0.22	0.39 ±0.39	0.74 ±0.64	1.32 ±0.99

## Sheet: Table S3
Table S3. Same with Table S1 but for the results in response to perturbed precipitation
Season	Component	Baseline	80% P	90% P	110% P	120% P
Annual	Subsurface runoff	195.82 ±31.01	137.43 ±21.80	166.10 ±26.33	226.39 ±35.78	257.66 ±40.60
	Rainfall runoff	62.30 ±10.23	48.96 ±7.92	55.58 ±9.06	69.13 ±11.43	76.05 ±12.65
	Snowmelt runoff	9.30 ±2.19	7.34 ±1.72	8.32 ±1.95	10.29 ±2.44	11.29 ±2.69
	Glacier melt runoff	21.46 ±1.67	21.18 ±1.67	21.32 ±1.67	21.60 ±1.67	21.73 ±1.67
Spring	Subsurface runoff	23.02 ±1.84	18.52 ±1.59	20.81 ±1.68	25.18 ±2.06	27.32 ±2.32
	Rainfall runoff	5.38 ±1.57	4.29 ±1.25	4.84 ±1.41	5.93 ±1.73	6.48 ±1.89
	Snowmelt runoff	5.92 ±1.28	4.72 ±1.04	5.32 ±1.16	6.52 ±1.39	7.11 ±1.51
	Glacier melt runoff	2.45 ±0.63	2.40 ±0.62	2.43 ±0.63	2.48 ±0.64	2.51 ±0.64
Summer	Subsurface runoff	68.49 ±19.53	43.37 ±11.99	55.27 ±15.61	82.90 ±23.67	98.39 ±27.96
	Rainfall runoff	46.70 ±8.72	36.63 ±6.75	41.62 ±7.73	51.85 ±9.75	57.09 ±10.80
	Snowmelt runoff	0.53 ±0.51	0.34 ±0.32	0.43 ±0.41	0.65 ±0.62	0.78 ±0.75
	Glacier melt runoff	14.68 ±0.74	14.52 ±0.75	14.60 ±0.75	14.75 ±0.74	14.83 ±0.73
Autumn	Subsurface runoff	74.99 ±14.45	51.61 ±10.25	63.22 ±12.35	86.76 ±16.54	98.42 ±18.64
	Rainfall runoff	11.41 ±3.21	8.93 ±2.48	10.16 ±2.84	12.68 ±3.59	13.97 ±3.99
	Snowmelt runoff	1.16 ±0.51	0.94 ±0.42	1.05 ±0.47	1.27 ±0.56	1.38 ±0.61
	Glacier melt runoff	4.57 ±0.66	4.49 ±0.65	4.54 ±0.66	4.61 ±0.66	4.64 ±0.66
Winter	Subsurface runoff	29.44 ±1.77	24.01 ±1.85	26.89 ±1.80	31.68 ±1.75	33.67 ±1.74
	Rainfall runoff	0.02 ±0.02	0.01 ±0.01	0.01 ±0.02	0.02 ±0.02	0.02 ±0.02
	Snowmelt runoff	0.27 ±0.12	0.23 ±0.09	0.25 ±0.10	0.30 ±0.13	0.32 ±0.14
	Glacier melt runoff	0.01 ±0.02	0.01 ±0.02	0.01 ±0.02	0.01 ±0.02	0.01 ±0.02

## Sheet: Table S4
Table S4. Same with Table S2 but for the results in response to perturbed precipitation
Season	Component	Baseline	80% P	90% P	110% P	120% P
Annual	Subsurface runoff	67.79 ±1.65	63.95 ±2.06	66.09 ±1.92	69.15 ±1.50	70.26 ±1.37
	Rainfall runoff	21.57 ±1.32	22.78 ±1.58	22.12 ±1.39	21.11 ±1.24	20.74 ±1.18
	Snowmelt runoff	3.22 ±0.88	3.42 ±0.92	3.31 ±0.94	3.14 ±0.87	3.08 ±0.86
	Glacier melt runoff	7.43 ±1.37	9.85 ±1.73	8.48 ±1.64	6.60 ±1.24	5.93 ±1.13
Spring	Subsurface runoff	62.60 ±3.36	61.87 ±3.61	62.31 ±3.47	62.78 ±3.29	62.91 ±3.23
	Rainfall runoff	14.64 ±3.88	14.35 ±3.72	14.49 ±3.80	14.79 ±3.95	14.93 ±4.01
	Snowmelt runoff	16.09 ±2.91	15.77 ±3.13	15.93 ±3.01	16.25 ±2.83	16.38 ±2.77
	Glacier melt runoff	6.67 ±1.93	8.01 ±2.32	7.27 ±2.11	6.19 ±1.78	5.77 ±1.66
Summer	Subsurface runoff	52.52 ±5.03	45.72 ±4.99	49.38 ±5.07	55.21 ±4.92	57.51 ±4.75
	Rainfall runoff	35.81 ±3.21	38.61 ±3.07	37.19 ±3.15	34.53 ±3.23	33.37 ±3.21
	Snowmelt runoff	0.41 ±0.44	0.36 ±0.37	0.38 ±0.41	0.43 ±0.47	0.45 ±0.50
	Glacier melt runoff	11.26 ±2.81	15.31 ±3.41	13.05 ±3.10	9.83 ±2.55	8.67 ±2.30
Autumn	Subsurface runoff	81.39 ±2.31	78.23 ±3.05	80.06 ±2.64	82.38 ±2.06	83.12 ±1.85
	Rainfall runoff	12.39 ±2.01	13.53 ±2.48	12.87 ±2.21	12.04 ±1.86	11.80 ±1.74
	Snowmelt runoff	1.26 ±0.50	1.43 ±0.57	1.33 ±0.53	1.21 ±0.48	1.16 ±0.47
	Glacier melt runoff	4.96 ±1.31	6.81 ±1.76	5.74 ±1.51	4.38 ±1.16	3.92 ±1.03
Winter	Subsurface runoff	98.98 ±0.52	98.97 ±0.54	98.98 ±0.53	98.97 ±0.52	98.96 ±0.52
	Rainfall runoff	0.05 ±0.06	0.05 ±0.06	0.05 ±0.06	0.05 ±0.06	0.06 ±0.06
	Snowmelt runoff	0.92 ±0.42	0.93 ±0.43	0.92 ±0.42	0.93 ±0.42	0.95 ±0.42
	Glacier melt runoff	0.04 ±0.06	0.05 ±0.07	0.05 ±0.06	0.04 ±0.05	0.04 ±0.05

## Sheet: Table S5
Table S5. Details of REW attributes and runoff change in different scenarios
REWid	ELE (m)	DRA (m2)	MAT (℃)	MAP (mm)	GAR (%)	Runoff change in T scenarios (%)					Runoff change in P scenarios (%)
						T+1℃	T+2℃	T+3℃	T+4℃	T+5℃	0.8	0.9	1.1	1.2
1	4861.66	2.05986e+11	-0.205026	496.601	1.59895	-0.94768	-1.77298	-2.43978	-2.99309	-3.4206	-25.5196	-12.9567	13.2842	26.844
2	4678.42	1.94424e+10	-0.80869	733.198	6.24097	0.240337	0.760022	1.62441	2.72899	4.07561	-21.6906	-10.9501	11.1222	22.3761
3	4251.94	3.68769e+08	2.31905	684.721	0	-2.07572	-4.25709	-6.55744	-8.78304	-11.0766	-25.6022	-12.8905	13.0607	26.2547
4	4701.5	1.86266e+10	-0.940452	735.625	6.51431	0.32035	0.933058	1.90216	3.11904	4.58617	-21.5673	-10.8891	11.0612	22.2539
5	4367.55	3.50973e+08	0.32311	725.319	0	-2.22462	-4.34729	-6.47049	-8.51245	-10.5861	-25.362	-12.7868	12.9499	26.079
6	4724.45	1.79771e+10	-1.05872	736.914	6.74964	0.39438	1.08856	2.14746	3.46056	5.031	-21.4712	-10.8415	11.0147	22.1608
7	4551.53	4.39263e+08	-0.961556	723.907	0.115774	-3.52101	-6.49969	-8.83757	-10.9642	-13.3065	-26.659	-13.4898	13.736	27.7025
8	4767.8	1.62193e+10	-1.34222	735.333	7.46937	0.670836	1.64951	3.00322	4.62948	6.53984	-21.1003	-10.6548	10.8301	21.7899
9	4610.54	6.02907e+08	-0.994837	716.034	2.25436	-2.38699	-3.76281	-4.91171	-5.79919	-6.71563	-25.5165	-12.9611	13.228	26.639
10	4785.67	1.53266e+10	-1.39923	735.55	7.80456	0.799547	1.89046	3.36904	5.12491	7.17798	-20.8976	-10.55	10.7222	21.5717
11	4623.85	4.56948e+09	-0.28126	736.8	17.272	4.1456	8.76222	13.9403	19.2648	24.7533	-16.0177	-8.06927	8.21444	16.5296
12	4522.43	7.84461e+08	0.178385	735.996	12.5585	3.17538	6.84806	10.4261	13.9864	17.624	-17.2701	-8.7211	8.91431	17.9348
13	4602.22	1.03169e+09	-1.16131	705.977	30.7458	7.23767	14.8495	23.011	31.3757	40.1016	-11.8428	-5.95801	6.04086	12.154
14	4893.68	9.60515e+09	-2.15162	730.713	3.76915	-1.33407	-2.53889	-3.49057	-4.00583	-4.11679	-23.9876	-12.1167	12.3042	24.7471
15	4910.45	1.74208e+09	-2.1669	799.81	6.46041	-0.178407	-0.400421	-0.340169	0.241145	1.09966	-22.5154	-11.3518	11.49	23.1079
16	4806.38	3.87269e+08	-0.892851	792.776	3.80154	-2.12634	-3.68863	-4.86041	-5.35992	-5.96125	-24.1117	-12.1585	12.3026	24.747
17	5008.65	1.15381e+09	-3.02251	792.422	7.68075	0.618629	0.900467	1.40397	2.47775	4.00046	-21.8644	-11.0247	11.1544	22.4374
18	5160.37	2.63193e+08	-3.35916	798.478	11.6609	2.13031	4.01366	5.82467	8.41983	11.3015	-19.5338	-9.83681	9.90042	19.8949
19	5110.45	3.5576e+08	-2.68842	776.584	7.30326	0.511694	0.818335	1.69659	2.96967	4.67398	-21.8615	-11.0413	11.1822	22.5246
20	4937.64	7.18926e+09	-2.3194	705.11	3.36562	-1.51673	-2.87366	-4.02766	-4.76581	-5.00394	-24.2972	-12.2822	12.4873	25.1191
21	4927	2.03598e+09	-2.72533	705.6	3.47607	-1.62403	-3.22819	-4.82427	-6.03258	-6.69981	-23.8876	-12.0517	12.2093	24.5292
22	4868.71	1.99495e+08	-1.57245	729.94	8.55501	0.601382	1.27838	2.14959	3.72638	5.47232	-20.6691	-10.4491	10.5849	21.274
23	5008.24	1.38183e+09	-3.01493	697.128	3.77556	-1.51297	-3.03767	-4.54298	-5.74852	-6.48244	-23.6054	-11.9024	12.0574	24.219
24	5051.11	2.64919e+08	-2.16865	716.081	4.08123	-1.62002	-2.96258	-4.24703	-5.3549	-5.50366	-23.2708	-11.7345	11.8408	23.7848
25	5041.97	7.76709e+08	-3.61649	678.073	1.28746	-2.65449	-5.64254	-8.68672	-11.3667	-13.9328	-25.4285	-12.8239	13.0018	26.1284
26	5150.29	1.83862e+08	-4.31746	664.044	1.73722	-2.18319	-4.84835	-7.82665	-10.5059	-12.8707	-25.2442	-12.7374	12.9546	26.0426
27	5113.71	2.50979e+08	-3.66515	692.13	1.85495	-2.29083	-4.86943	-7.60752	-9.81757	-12.0697	-24.8767	-12.5333	12.6723	25.436
28	4983.61	4.45028e+09	-2.40564	681.487	2.86298	-1.73363	-3.24517	-4.58684	-5.47407	-5.78129	-25.0063	-12.6647	12.9201	26.0332
29	4987.9	6.08213e+08	-3.2118	648.112	0.0533111	-3.82001	-8.01367	-11.7124	-15.3508	-18.5771	-27.3085	-13.813	14.0854	28.3674
30	5002.24	3.49778e+09	-2.29392	679.188	2.95489	-1.60393	-2.89054	-4.08799	-4.75692	-4.86273	-24.962	-12.648	12.913	26.0323
31	5017.13	6.42897e+08	-2.13118	653.12	0.440455	-3.33589	-6.25382	-9.21437	-11.9494	-13.8467	-27.9881	-14.2105	14.5364	29.368
32	5044.59	1.81466e+09	-2.60981	681.957	3.60219	-0.997733	-1.72938	-2.43746	-2.64035	-2.32559	-24.1948	-12.2492	12.4844	25.1531
33	4970.38	7.95161e+08	-2.20408	685.101	0.691203	-2.50902	-4.73019	-6.97899	-9.23588	-10.6878	-26.9674	-13.6672	13.9735	28.1984
34	5137.18	8.15427e+08	-2.69453	671.647	6.10332	0.0717352	0.558011	1.1638	2.70382	4.51807	-22.0559	-11.1569	11.3611	22.8604
35	4883.3	1.86148e+11	-0.155096	471.495	1.11739	-1.22149	-2.35677	-3.3762	-4.31111	-5.14661	-26.4196	-13.4287	13.7932	27.8963
36	4408.4	1.21306e+09	1.08772	678.796	0.0255824	-2.69648	-5.1492	-7.81266	-10.336	-12.6268	-27.3856	-13.8556	14.1009	28.4688
37	4896.74	1.83084e+11	-0.197259	467.349	1.13131	-1.19745	-2.31037	-3.30318	-4.21279	-5.02228	-26.4722	-13.4585	13.829	27.9729
38	4356.36	1.69805e+09	1.39249	779.681	1.73009	-2.41143	-4.42227	-6.20034	-7.64716	-8.97076	-24.6977	-12.4887	12.687	25.5331
39	4473.4	5.71471e+08	0.719144	763.454	3.16699	-2.05389	-3.32602	-4.39177	-5.18257	-5.69565	-24.0147	-12.1284	12.326	24.7787
40	4299.02	7.4554e+08	1.91557	821.821	0.980061	-2.6991	-5.24387	-7.46462	-9.30111	-11.0832	-24.919	-12.5973	12.7769	25.706
41	4904.36	1.8085e+11	-0.222284	463.807	1.12252	-1.17925	-2.2803	-3.26293	-4.16701	-4.97033	-26.5397	-13.4949	13.8706	28.0606
42	4692.37	1.24527e+09	-1.17924	702.568	0.886946	-3.42297	-5.85974	-7.88086	-9.55533	-11.1314	-27.3883	-13.8998	14.1705	28.5335
43	4909.28	1.78668e+11	-0.230616	461.146	1.13004	-1.15036	-2.23313	-3.20047	-4.09238	-4.88262	-26.5567	-13.5048	13.8838	28.0902
44	4614.99	1.03614e+09	-0.484483	768.739	6.25809	-0.597008	-0.8951	-0.338289	0.540259	1.79137	-22.474	-11.381	11.6041	23.4068
45	4913.55	1.76804e+11	-0.244744	458.399	1.10504	-1.15763	-2.25092	-3.23761	-4.15115	-4.96651	-26.639	-13.5484	13.9315	28.1888
46	4826.48	6.47069e+08	-1.26839	687.539	0.849389	-2.55277	-4.66076	-6.35336	-7.6991	-9.41781	-27.2163	-13.8255	14.2271	28.6958
47	4915.41	1.75742e+11	-0.243664	456.833	1.09061	-1.16903	-2.27501	-3.27621	-4.20692	-5.03634	-26.6881	-13.5744	13.9598	28.248
48	4532.16	6.76196e+08	1.40991	753.799	1.99562	-2.67191	-4.67436	-6.22947	-7.48486	-8.72222	-25.5936	-13.0116	13.333	26.9361
49	4917.68	1.74656e+11	-0.250442	455.245	1.08953	-1.15749	-2.25738	-3.25365	-4.18101	-5.00607	-26.7057	-13.5838	13.9704	28.2702
50	4963.57	1.75598e+09	-1.91793	639.007	1.5791	-2.02183	-3.73909	-5.4002	-6.98558	-8.01637	-26.2949	-13.3362	13.6866	27.6463
51	5120.35	2.20919e+08	-2.75343	627.437	0.990923	-2.80555	-5.16696	-7.12365	-9.36434	-10.8319	-27.394	-13.9213	14.3083	28.9164
52	5099.85	7.66535e+08	-3.20496	681.028	2.86797	-1.45813	-3.06022	-4.39445	-5.51332	-5.97904	-25.3269	-12.8242	13.1258	26.5064
53	5214.11	1.78443e+08	-4.04169	659.435	5.77335	0.702608	0.669355	0.98891	1.69493	3.03422	-23.2324	-11.7493	12.0394	24.3263
54	5155.17	1.99552e+08	-3.2967	692.741	2.23277	-2.3377	-4.57423	-6.8751	-8.91905	-10.2068	-25.3994	-12.8479	13.0986	26.3742
55	4920.8	1.71716e+11	-0.253979	452.258	1.09204	-1.13946	-2.22596	-3.20658	-4.11692	-4.93105	-26.7297	-13.5975	13.9863	28.3043
56	4932.59	6.16483e+08	-0.992354	586.595	0.832013	-1.55399	-3.31377	-4.51519	-5.82456	-7.03128	-26.8252	-13.638	14.0534	28.4692
57	4922.35	1.7075e+11	-0.259453	451.514	1.09522	-1.14019	-2.22555	-3.20666	-4.1165	-4.9298	-26.7489	-13.6079	13.9979	28.3284
58	4408.1	6.04098e+08	3.08435	600.223	0	-1.96386	-4.11608	-6.38205	-8.58408	-10.7485	-27.8799	-14.1409	14.5082	29.2872
59	4925.01	1.6983e+11	-0.276544	450.77	1.09904	-1.13926	-2.22238	-3.19945	-4.10493	-4.91326	-26.7601	-13.6142	14.0053	28.3442
60	4844.06	1.58057e+09	-0.931244	583.993	1.06464	-1.20542	-1.81323	-2.60398	-3.08175	-4.14739	-26.8201	-13.5984	13.9552	28.121
61	4927.76	1.67286e+11	-0.289091	448.941	1.10239	-1.14252	-2.2345	-3.21515	-4.12831	-4.93406	-26.7955	-13.6338	14.0277	28.3926
62	4700.83	2.18949e+09	1.54996	485.002	0.150984	-1.87269	-4.08165	-6.05179	-8.05704	-9.8565	-28.1568	-14.3262	14.6811	29.698
63	4856.13	2.09847e+08	0.151642	438.494	0.153223	-2.47556	-4.40541	-6.1412	-7.79533	-10.0323	-29.1874	-14.9491	15.5275	31.3784
64	4960.8	5.03804e+08	-0.341232	466.06	0	-2.43193	-4.55491	-6.34719	-8.01822	-9.80217	-29.027	-14.8151	15.2918	31.0127
65	4932	1.64506e+11	-0.320588	448.252	1.11901	-1.1345	-2.21241	-3.17929	-4.07682	-4.86772	-26.7922	-13.6328	14.0283	28.3948
66	4553.56	2.47582e+09	2.74079	431.875	0.761671	-1.47891	-2.91379	-4.24718	-5.41485	-6.70372	-27.2324	-13.8367	14.2473	28.8338
67	4598.75	1.96498e+08	0.852743	452.869	0	-2.17002	-4.2165	-6.02494	-8.27485	-10.6441	-28.6974	-14.62	15.0635	30.4365
68	4962.45	5.95698e+08	-0.519322	462.755	3.16563	1.05704	1.87922	3.11598	4.41362	5.55796	-24.0481	-12.2276	12.6351	25.5644
69	4940.68	1.60874e+11	-0.389248	448.414	1.13256	-1.12707	-2.19593	-3.15264	-4.04065	-4.81885	-26.7954	-13.6355	14.0318	28.4028
70	4708.63	3.946e+08	2.38729	470.469	0	-2.55945	-5.2221	-7.75157	-10.1991	-12.6477	-29.3138	-14.9297	15.3493	31.1085
71	4943.68	1.59862e+11	-0.413745	448.449	1.13973	-1.1227	-2.18644	-3.13773	-4.02041	-4.79269	-26.7995	-13.638	14.035	28.4096
72	4421.69	5.76615e+08	4.86926	432.124	0	-2.71731	-5.45561	-8.00708	-10.4883	-12.8476	-29.3881	-14.9867	15.496	31.4454
73	4948.34	1.58623e+11	-0.457249	448.544	1.14863	-1.11506	-2.17071	-3.11407	-3.98902	-4.7531	-26.7956	-13.6361	14.0334	28.4063
74	4382.22	5.24799e+08	3.22247	414.039	0	-2.67232	-5.18319	-7.60214	-10.0218	-12.3272	-28.9978	-14.8226	15.3051	31.0236
75	4952.02	1.57653e+11	-0.483442	448.666	1.1557	-1.10905	-2.15894	-3.09624	-3.96493	-4.72268	-26.7929	-13.6348	14.0322	28.404
76	4366.55	2.45843e+08	5.46738	393.911	0	-2.80805	-5.57377	-8.23069	-10.7484	-13.0599	-29.6065	-15.1376	15.6212	31.6995
77	4956.28	1.56768e+11	-0.523174	448.859	1.16222	-1.10613	-2.15299	-3.08715	-3.95244	-4.70669	-26.8004	-13.639	14.0371	28.4146
78	4884.68	3.55128e+10	-0.797967	563.646	1.5887	-1.62195	-3.16614	-4.55347	-5.69801	-6.66964	-26.5274	-13.4489	13.7525	27.7484
79	5003.32	5.42864e+09	-0.381665	476.002	4.75325	1.30247	2.52538	4.17036	6.19193	8.44628	-23.4905	-11.9213	12.2043	24.6195
80	5171.76	6.97337e+08	-0.752216	460.001	0.383022	-1.86998	-3.85771	-5.73203	-7.74875	-9.69917	-28.4114	-14.4173	14.7714	29.8199
81	5031.75	4.31738e+09	-0.908144	479.609	5.91483	1.96666	3.84686	6.21347	9.04432	12.142	-22.5788	-11.4614	11.7351	23.6727
82	4909.75	5.06687e+08	-0.357541	502.484	0	-2.29227	-4.81048	-7.19732	-9.51088	-11.878	-29.1956	-14.809	15.1133	30.4819
83	5105.33	3.16395e+09	-1.51246	474.149	8.01385	3.14142	6.16429	9.83036	14.0431	18.6342	-20.8601	-10.5868	10.8506	21.892
84	5361.13	7.22666e+08	-3.80159	482.151	17.6448	7.26788	13.7369	21.0155	29.349	38.3366	-16.8183	-8.53087	8.68198	17.4661
85	5045.4	2.16866e+09	-0.946562	471.953	5.60399	1.62342	3.44636	5.8661	8.66126	11.757	-22.2432	-11.2918	11.6049	23.4407
86	5304.91	5.41234e+08	-2.66502	505.84	15.2696	5.20001	10.7013	17.3169	24.4044	32.2659	-16.7735	-8.4855	8.74144	17.5703
87	5032.16	1.26758e+09	-0.684171	456.094	2.42196	-0.289893	-0.565762	-0.481779	-0.00991344	0.426453	-25.2891	-12.8546	13.2017	26.6971
88	4882.16	2.92683e+10	-1.04888	583.682	1.04604	-2.1006	-4.09704	-5.9785	-7.63534	-9.1265	-27.0367	-13.705	14.0122	28.2737
89	4760.56	3.63447e+08	2.63705	495.813	0	-2.44421	-5.11466	-7.72496	-10.2034	-12.658	-29.7847	-15.1132	15.4496	31.2656
90	4907.07	2.77668e+10	-1.36261	589.205	1.1026	-2.10664	-4.10289	-5.98082	-7.62757	-9.10393	-27.0246	-13.6999	14.0084	28.2662
91	4417.24	2.03353e+09	3.56396	525.284	0	-2.37593	-4.72583	-7.15065	-9.50335	-11.7802	-28.8275	-14.6197	14.8908	30.0328
92	4951.51	2.54887e+10	-1.81036	594.967	1.20115	-2.09338	-4.0707	-5.91638	-7.51881	-8.94398	-26.9185	-13.6463	13.9583	28.1665
93	4873.17	2.36936e+09	-0.629416	616.415	0.0282172	-2.735	-5.33595	-7.65972	-9.79168	-12.0731	-28.2883	-14.3706	14.7404	29.7531
94	4986.38	2.20723e+10	-2.20626	594.588	1.38404	-2.0312	-3.94193	-5.73392	-7.27018	-8.58813	-26.7559	-13.5614	13.8688	27.9866
95	4982.02	2.22563e+09	-2.19789	632.212	0.114023	-2.80524	-5.42241	-8.05108	-10.3885	-12.2627	-28.668	-14.5604	14.9811	30.2717
96	4997.27	1.95067e+10	-2.29358	590.29	1.55306	-1.96177	-3.80758	-5.51497	-6.96914	-8.22424	-26.5746	-13.4676	13.7646	27.7733
97	4910.52	4.26484e+09	-1.17047	501.066	4.05121	0.449299	1.22475	2.39032	3.84468	5.47562	-24.0712	-12.2068	12.5318	25.2951
98	4805.15	1.65698e+09	-0.955087	522.98	0.128642	-2.47893	-4.75855	-6.78515	-8.58159	-10.4192	-27.9896	-14.2351	14.6273	29.5851
99	5084.39	1.70448e+09	-1.89132	462.523	10.0116	3.75553	8.06081	12.9005	18.3556	24.2079	-19.5425	-9.88245	10.1729	20.4669
100	4956	3.66096e+08	-1.41158	441.407	5.63289	1.51583	3.41761	5.8246	8.75585	11.7521	-22.5143	-11.4442	11.8024	23.7826
101	5185.79	1.00637e+09	-2.26496	472.038	14.8833	5.41389	11.4755	18.2063	25.6027	33.5922	-17.1202	-8.62925	8.8766	17.8184
102	5062.93	1.31136e+10	-3.114	622.056	0.992659	-2.60723	-5.16905	-7.62082	-9.80005	-11.724	-27.0427	-13.7032	13.9892	28.2278
103	5050.92	2.80195e+08	-2.25558	598.143	0.0806655	-2.96435	-5.11666	-7.61553	-9.33347	-11.5245	-29.3541	-14.929	15.3634	31.0783
104	5078.34	1.20868e+10	-3.28011	625.479	1.07511	-2.64994	-5.2536	-7.76366	-9.97631	-11.9084	-26.9986	-13.681	13.9626	28.1724
105	5062.22	2.38102e+09	-3.23461	594.74	4.02087	-0.138015	-0.204723	-0.170451	0.0659386	0.662633	-24.7359	-12.5675	12.8443	25.9833
106	5197.31	2.61622e+08	-3.53035	593.478	2.23705	-0.881185	-1.8442	-3.19886	-4.12011	-4.94684	-26.4509	-13.4708	13.8942	28.1474
107	5115.89	9.79946e+08	-3.43975	592.89	8.29241	2.07323	4.39564	7.08166	9.87917	13.1583	-21.8527	-11.1173	11.355	23.0143
108	5089.7	9.28852e+09	-3.35233	634.625	0.366761	-3.29445	-6.5534	-9.71351	-12.564	-15.1404	-27.557	-13.9568	14.2393	28.715
109	5140.33	4.61757e+08	-3.49681	622.109	0.523856	-3.49672	-6.22268	-9.04025	-11.6299	-13.7794	-28.9424	-14.7322	15.1034	30.4697
110	5088.19	8.25704e+09	-3.42847	636.374	0.319627	-3.35818	-6.69978	-9.95134	-12.8816	-15.564	-27.5403	-13.9412	14.2218	28.6744
111	5108.04	2.53298e+09	-3.71287	644.578	0.373748	-3.62582	-7.32407	-10.8595	-13.8889	-16.6411	-27.3925	-13.8444	14.0712	28.3751
112	5178.65	5.74233e+08	-3.86728	642.928	0.214934	-3.73925	-7.72	-11.7481	-15.1646	-18.3242	-27.3795	-13.8653	14.0459	28.2977
113	5039.02	1.11708e+09	-3.3185	656.509	0	-3.71089	-7.58935	-11.2085	-14.411	-17.3549	-27.4787	-13.8702	14.1075	28.4572
114	5002.61	3.04025e+08	-2.79169	662.059	0	-3.6473	-7.57752	-10.9211	-14.3393	-17.311	-27.6379	-13.971	14.2693	28.7478
115	5082.48	4.71866e+08	-3.22759	666.186	0	-3.73867	-7.78149	-11.6101	-14.9459	-17.9636	-27.124	-13.6836	13.8274	27.8798
116	5078.4	5.22033e+09	-3.35286	633.085	0.275764	-3.29905	-6.51698	-9.71122	-12.6666	-15.3603	-27.6517	-14.0055	14.3057	28.8417
117	5240.89	8.31854e+08	-3.85485	601.968	1.52531	-2.28897	-4.23614	-6.33804	-8.15832	-9.68422	-27.0619	-13.7233	14.0794	28.4499
118	5058.41	3.77742e+09	-3.38911	640.987	0.0369457	-3.5348	-6.99698	-10.4801	-13.7028	-16.6624	-27.7104	-14.0235	14.3066	28.8186
119	5046.06	2.6538e+08	-3.86828	645.373	0	-3.94851	-7.31848	-10.9629	-13.9973	-17.0057	-28.3696	-14.3627	14.5997	29.4282
120	5062.3	2.77815e+09	-3.42218	645.061	0.0465787	-3.57782	-7.1556	-10.7943	-14.2302	-17.2716	-27.4694	-13.8923	14.1452	28.471
121	5053.49	2.12844e+08	-3.85122	660.352	0	-3.34059	-7.0031	-10.762	-14.4195	-17.6431	-27.4432	-13.8454	14.0763	28.3356
122	5068.48	1.79345e+09	-3.53544	653.022	0.0692894	-3.65127	-7.34118	-11.0598	-14.601	-17.6919	-27.1996	-13.7382	13.9822	28.1137
123	5007.6	2.35394e+08	-3.26594	633.355	0	-3.82611	-7.68397	-11.4608	-14.9835	-18.0802	-27.4468	-13.8778	14.0741	28.2635
124	5117.9	5.26103e+08	-3.625	669.193	0.145772	-3.5062	-7.16856	-10.6722	-14.0752	-17.0703	-26.6512	-13.4312	13.6263	27.4123
125	4980.69	1.20808e+11	-0.464822	415.322	1.04115	-0.860562	-1.67045	-2.38839	-3.12029	-3.77053	-26.9491	-13.7396	14.1841	28.7556
126	5076.81	3.57809e+08	0.190168	417.07	0.182988	-2.02457	-4.28132	-6.60738	-8.90074	-11.0921	-28.8426	-14.6576	15.0584	30.4429
127	4981.91	1.20005e+11	-0.475491	415.305	1.04752	-0.85204	-1.65245	-2.36048	-3.08305	-3.72365	-26.9433	-13.7371	14.1825	28.7534
128	4933.55	1.76799e+08	0.229292	393.542	0.0333177	-2.20671	-4.60413	-6.82424	-9.175	-11.4299	-28.8935	-14.6614	15.0672	30.413
129	4985.1	1.19009e+11	-0.497812	415.541	1.05521	-0.847884	-1.64371	-2.3468	-3.06477	-3.70026	-26.9668	-13.7503	14.1979	28.7864
130	4955.95	2.58588e+09	0.729125	422.499	0.910162	-1.37376	-2.74395	-3.97559	-5.13006	-6.3193	-27.0048	-13.7297	14.1172	28.5742
131	4977.32	3.74706e+08	0.382455	421.886	0.0246786	-2.27618	-4.56153	-6.58829	-8.73552	-11.0666	-28.6569	-14.5755	14.9361	30.2309
132	5160.92	9.32974e+08	-0.814633	465.364	2.4581	0.00690405	-0.193712	-0.092432	0.170052	0.460724	-24.7617	-12.5977	12.9529	26.2666
133	5121.87	2.22661e+08	-0.999901	460.986	0.420507	-1.72952	-3.84222	-5.77796	-7.55086	-9.30946	-28.1523	-14.311	14.7034	29.79
134	5220.92	5.4611e+08	-1.26817	480.284	3.77834	0.891181	1.5876	2.6047	3.91786	5.25377	-23.3138	-11.8765	12.2172	24.7965
135	4986.42	1.1624e+11	-0.532828	415.471	1.0597	-0.834685	-1.61609	-2.30574	-3.01254	-3.63391	-26.9714	-13.7538	14.2033	28.7988
136	5209.77	2.2096e+08	0.318721	381.004	0.00836067	-2.49693	-5.23612	-7.67773	-10.0607	-12.544	-29.4501	-14.982	15.3565	31.0612
137	4988.02	1.15441e+11	-0.556726	415.857	1.06702	-0.828042	-1.60235	-2.285	-2.9852	-3.59948	-26.9753	-13.7563	14.2066	28.8062
138	4823.89	1.46188e+09	0.844093	345.704	0.984752	-1.46439	-2.63115	-3.86326	-4.91926	-5.77002	-27.6589	-14.1238	14.5383	29.4752
139	4757.59	2.8542e+08	0.876449	332.321	0	-2.96072	-5.94136	-8.78788	-11.5135	-14.2292	-30.3484	-15.4938	15.9362	32.3345
140	4979.94	8.24912e+08	-0.0286561	358.681	1.74514	-0.562499	-0.689917	-0.939994	-0.974938	-0.730336	-26.128	-13.3582	13.7383	27.8501
141	4990.63	1.13758e+11	-0.580745	416.862	1.07015	-0.821929	-1.59252	-2.26951	-2.96616	-3.57797	-26.9808	-13.7594	14.211	28.8157
142	4962.44	1.74229e+09	0.26914	433.597	0.0130498	-2.33131	-4.61228	-6.95959	-9.29378	-11.4827	-28.8152	-14.6186	14.9773	30.2866
143	4791.6	4.27939e+08	1.2135	438.381	0	-2.62845	-5.06781	-7.44868	-9.91769	-12.4216	-29.258	-14.832	15.1645	30.6907
144	5105.11	1.02717e+09	-0.789852	442.402	0.0221351	-2.2431	-4.47925	-6.82234	-9.13004	-11.2062	-28.7831	-14.6027	14.9562	30.2362
145	5193.47	2.65032e+08	-1.05269	429.693	0.0748434	-2.36874	-4.51815	-6.8435	-9.28949	-11.1642	-28.918	-14.6658	15.0501	30.4548
146	5092.42	4.26222e+08	-1.31681	456.311	0	-2.07757	-4.21549	-6.53601	-8.88258	-10.8936	-28.6327	-14.4971	14.8547	30.0052
147	4991.88	111653000000	-0.60228	416.788	1.09012	-0.795351	-1.5397	-2.18721	-2.85508	-3.43907	-26.9589	-13.7498	14.2038	28.8028
148	4786.55	4.01015e+08	1.9107	410.248	0	-2.61094	-5.19056	-7.69436	-10.2335	-12.6778	-29.4316	-14.9756	15.348	31.0484
149	4994.64	1.10859e+11	-0.629967	417.028	1.09793	-0.787122	-1.52316	-2.16209	-2.82168	-3.39713	-26.961	-13.7515	14.2067	28.8097
150	5072.94	8.03339e+09	-1.06398	487.339	0.53456	-1.54586	-3.09003	-4.63714	-6.15114	-7.61912	-27.1854	-13.7835	14.0728	28.4221
151	5079.51	2.72759e+08	1.32734	500.413	0	-2.22488	-4.55757	-6.85836	-9.0927	-11.2437	-28.184	-14.3364	14.6256	29.4865
152	5112.13	7.21291e+09	-1.4381	489.01	0.595367	-1.49746	-2.98312	-4.47495	-5.93682	-7.35555	-27.1759	-13.7792	14.0704	28.4202
153	5206.12	2.58665e+09	-1.98032	471.342	1.34188	-1.00017	-1.708	-2.77256	-3.39545	-4.05158	-26.5657	-13.5052	13.7684	27.8716
154	5093.66	4.01375e+09	-1.40482	501.656	0.205133	-1.75801	-3.62292	-5.31955	-7.20703	-9.00881	-27.5616	-13.9576	14.2673	28.803
155	5168.82	1.46923e+09	-2.28066	496.496	0.558261	-1.56168	-3.04615	-4.41606	-6.14223	-7.42342	-27.3374	-13.8481	14.1712	28.648
156	5100.78	1.56776e+09	-1.11351	502.767	0.00200337	-1.84672	-3.93319	-5.95258	-7.89166	-9.97441	-27.8277	-14.0848	14.4183	29.0971
157	5103.74	2.20652e+08	-1.6979	486.345	0	-1.75942	-3.90651	-6.08584	-8.13124	-10.1388	-28.219	-14.2714	14.6061	29.4906
158	5221.21	2.96444e+08	-2.18576	497.86	0.0105949	-1.90436	-3.74132	-5.9944	-8.11575	-10.1548	-28.3444	-14.3923	14.7595	29.8166
159	4996.37	1.0165e+11	-0.658504	411.686	1.15515	-0.695248	-1.33427	-1.86513	-2.42315	-2.89289	-26.9512	-13.7567	14.2321	28.8757
160	4709.98	1.19442e+10	1.65172	354.449	1.40197	-0.506097	-0.994082	-1.27585	-1.40403	-1.37585	-26.7059	-13.6134	14.0629	28.4921
161	4562.7	1.56157e+09	2.46841	376.081	0	-2.64336	-5.20208	-7.62133	-10.0093	-12.2975	-29.1606	-14.8558	15.2931	30.9751
162	4623.67	5.90952e+08	1.704	354.877	0	-2.6796	-5.32011	-7.86888	-10.3333	-12.7984	-29.3132	-14.9204	15.3385	31.0902
163	4574.36	7.45508e+08	2.62001	398.407	0	-2.60926	-5.10819	-7.42176	-9.75756	-11.9156	-28.9693	-14.7553	15.1967	30.7679
164	4857.61	8.38542e+09	0.651158	336.178	1.99696	0.427403	0.845472	1.51735	2.40801	3.49418	-25.9535	-13.2498	13.7375	27.864
165	4532.12	6.65626e+08	2.69253	312.01	0	-2.88655	-5.70861	-8.39066	-10.9963	-13.4367	-29.7886	-15.185	15.623	31.6187
166	4903.46	7.47474e+09	0.374971	338.465	2.24026	0.76708	1.51589	2.53437	3.78625	5.24	-25.603	-13.0751	13.5702	27.5343
167	4572.49	3.15657e+08	2.13929	316.206	0	-2.78514	-5.73397	-8.32304	-10.8409	-13.2858	-29.4697	-15.0109	15.4187	31.2432
168	4939.15	6.88408e+09	0.172402	340.767	2.43248	1.02123	2.02166	3.29889	4.82035	6.55223	-25.3826	-12.9675	13.4709	27.3392
169	4881.76	3.00564e+09	0.654084	319.076	0.434421	-1.61866	-3.37302	-5.17629	-7.01285	-8.61147	-28.1285	-14.4144	14.9884	30.4616
170	4869.17	1.34639e+09	0.71419	321.37	0	-2.33768	-5.14513	-7.94657	-10.7932	-13.2687	-30.022	-15.3807	16.0106	32.4804
171	4917.83	1.35116e+09	0.274337	321.597	0.966366	-0.864274	-1.53804	-2.36321	-3.22831	-3.94423	-26.3262	-13.5099	14.0682	28.651
172	5067.29	1.62154e+08	0.105719	320.218	0	-3.0486	-5.78938	-8.76993	-12.0811	-14.7619	-32.6774	-16.9048	17.6753	36.0797
173	4884.78	9.53735e+08	0.192509	324.646	1.36906	-0.396961	-0.509339	-0.73711	-1.00277	-1.1802	-24.9785	-12.81	13.3583	27.2083
174	4853.82	2.30137e+08	0.0839203	340.167	5.67364	3.74981	7.85423	11.7361	15.5589	19.4398	-17.2574	-8.85231	9.29769	18.9312
175	4959.9	3.06739e+08	-0.829432	329.21	0	-3.62919	-6.12513	-8.69452	-11.7137	-14.7728	-30.0786	-15.4673	16.1621	32.9357
176	5064	3.34725e+09	-0.787359	366.648	4.61264	3.01293	6.05731	9.59063	13.5581	17.7265	-23.3701	-11.9186	12.3851	25.1159
177	4991	8.27861e+08	0.00201159	388.339	2.42027	0.392389	0.81931	1.16273	1.56541	1.90214	-26.3571	-13.4246	13.8798	28.1122
178	5050.18	1.77269e+08	-1.06046	401.191	0	-2.23048	-4.18722	-6.37001	-8.31504	-10.7251	-30.1537	-15.4168	16.0334	32.5871
179	5092.52	3.25126e+08	-0.985481	408.094	6.16267	3.34125	6.67067	9.95389	13.0682	16.2007	-22.9694	-11.6811	11.9999	24.2489
180	5129.8	2.32668e+09	-1.43175	363.057	5.77477	4.21721	8.45818	13.4048	18.9301	24.7672	-22.1191	-11.2898	11.7611	23.8657
181	5299.14	3.30156e+08	-1.84569	365.419	0.810501	-0.0264581	-1.16339	-2.09788	-2.71817	-3.53327	-28.6988	-14.7593	15.4311	31.3782
182	5461.4	7.41531e+08	-4.18645	395.258	17.1916	9.49299	19.0569	29.876	41.7677	54.2704	-15.9148	-8.06512	8.36874	16.9087
183	5037.7	8.92867e+10	-0.993094	419.216	1.12756	-0.713397	-1.36584	-1.9209	-2.5243	-3.04687	-26.9971	-13.7834	14.2639	28.9466
184	4588.89	1.74498e+08	3.05324	474.758	0	-2.11721	-4.16881	-6.19643	-8.17765	-10.0701	-27.5507	-13.9415	14.1928	28.6165
185	5040	8.86489e+10	-1.01799	418.814	1.13567	-0.70291	-1.34472	-1.88788	-2.48028	-2.99165	-27.004	-13.7883	14.2714	28.9641
186	5018	2.62515e+09	0.123024	507.18	0.431273	-1.68871	-3.54334	-5.26832	-6.93317	-8.65988	-27.2624	-13.7965	14.0119	28.1648
187	5044.97	5.17598e+08	-0.263343	508.401	2.05187	-0.587815	-1.32449	-1.86005	-2.2783	-2.67876	-25.6203	-12.9653	13.2758	26.8087
188	5142.26	7.53584e+08	-0.479719	516.911	0.0930373	-1.94968	-4.22156	-6.27941	-8.18119	-10.2485	-27.8462	-14.1058	14.3175	28.7356
189	5044.93	8.55758e+10	-1.08481	415.835	1.16322	-0.658385	-1.24556	-1.73491	-2.27872	-2.73485	-27.0251	-13.8059	14.3037	29.0437
190	4806.38	5.85715e+09	1.1887	445.253	0.0442432	-1.91758	-3.92156	-6.07944	-8.10627	-10.0757	-27.6678	-14.0624	14.4412	29.18
191	4760.03	4.25606e+08	2.28392	479.334	0.0261917	-2.12673	-4.14922	-6.19498	-8.16822	-10.1005	-27.4377	-13.9213	14.2399	28.7622
192	4952.47	4.27345e+09	0.0465041	435.805	0.0580308	-1.90604	-3.96067	-6.258	-8.40336	-10.4764	-28.0055	-14.2541	14.6794	29.6878
193	5125.62	4.12225e+08	-0.963104	479.99	0.02141	-1.33068	-3.50157	-5.64615	-7.78927	-9.90166	-27.6951	-14.0784	14.454	29.2466
194	4899.6	3.23156e+09	0.0956887	417.844	0.0602939	-1.95963	-4.04806	-6.47179	-8.71008	-10.8482	-28.3733	-14.4625	14.9214	30.1935
195	5144.18	5.21097e+08	-1.36939	436.569	0.170182	-1.45621	-3.014	-5.11911	-7.29765	-9.32239	-27.9814	-14.2901	14.7802	29.95
196	4949.3	1.87235e+09	-0.419074	387.398	0.0566999	-2.10736	-4.40103	-7.08946	-9.56629	-11.9067	-29.1151	-14.8781	15.3962	31.2077
197	4851.51	4.80265e+08	0.499662	365.397	0	-2.42213	-5.06634	-7.71889	-10.3258	-12.8958	-29.869	-15.2646	15.8919	32.231
198	4998.84	8.47487e+08	-0.960598	371.985	0.0138513	-2.19774	-4.31962	-7.49559	-10.2273	-12.7376	-29.6014	-15.2012	15.7731	31.9535
199	5064.19	7.95212e+10	-1.27079	413.506	1.24853	-0.553744	-1.02296	-1.3732	-1.7936	-2.12352	-26.9924	-13.7961	14.3056	29.0607
200	4973.75	1.53071e+09	0.496686	475.323	0.00890583	-2.23694	-4.33367	-6.49341	-8.66411	-10.7988	-28.3043	-14.3651	14.7321	29.7419
201	4954.5	1.93379e+08	0.14545	481.002	0.000282513	-1.86261	-4.28995	-6.61575	-8.82991	-11.0389	-28.583	-14.5289	14.9965	30.3365
202	5231.48	7.65636e+08	-1.11314	471.807	0.0177338	-2.40247	-4.30152	-6.38016	-8.59506	-10.739	-28.4726	-14.4632	14.8226	29.9389
203	5314.85	1.88738e+08	-1.36018	494.829	0.0719391	-2.45596	-4.66563	-6.82874	-9.1404	-11.3913	-28.7923	-14.6238	14.9929	30.2448
204	5294.26	2.49593e+08	-1.04179	464.414	0	-2.614	-4.64323	-6.7744	-9.1015	-11.3822	-29.0196	-14.7534	15.1602	30.6507
205	5068.57	7.76736e+10	-1.33477	412.037	1.27805	-0.510458	-0.937064	-1.23967	-1.61456	-1.89726	-26.9882	-13.7977	14.3137	29.0835
206	5151.09	2.10133e+10	-0.759571	420.233	0.341799	-2.01533	-3.8946	-5.79605	-7.59492	-9.36709	-28.6535	-14.6151	15.1286	30.684
207	5142.92	9.74701e+09	-0.730809	391.06	0.287526	-2.42876	-4.37493	-6.42961	-8.38054	-10.321	-29.6114	-15.1789	15.8727	32.3476
208	4622.39	5.34738e+08	2.72267	356.67	0	-2.69827	-5.31588	-7.91301	-10.306	-12.6799	-29.994	-15.3092	15.7969	32.0244
209	5217	7.62655e+09	-1.27472	396.48	0.358898	-2.58973	-4.45517	-6.44185	-8.33448	-10.2185	-29.9607	-15.3804	16.1588	33.0142
210	5358.44	1.93469e+09	-2.03215	390.208	0.666066	-3.22901	-4.25669	-6.07885	-7.63208	-9.48123	-29.9267	-15.3957	16.2491	33.2025
211	5247.22	2.99826e+09	-1.81224	422.413	0.298336	-2.79401	-5.17698	-7.0903	-9.20252	-11.1953	-30.844	-15.8623	16.6809	34.1713
212	5116.81	9.17333e+08	-1.08598	425.346	0	-3.21847	-5.55158	-7.55092	-9.40947	-12.5869	-31.9464	-16.4841	17.3489	35.5432
213	5405.5	1.27526e+09	-2.76789	441.484	0.599494	-2.61353	-5.08071	-7.00176	-9.00633	-10.2793	-30.3211	-15.5647	16.3509	33.4823
214	5422.07	3.5363e+08	-2.78055	437.685	0.597294	-2.83122	-6.02317	-8.49562	-10.2419	-11.4079	-30.9922	-15.8933	16.6641	34.0386
215	5498.41	6.06552e+08	-3.37284	452.759	0.911957	-2.00433	-4.12956	-5.71944	-7.98465	-8.43476	-29.4506	-15.1001	15.8822	32.6763
216	5175.38	1.08628e+10	-0.904535	446.676	0.403193	-1.7655	-3.61626	-5.43384	-7.14914	-8.82658	-28.165	-14.3227	14.7342	29.7924
217	5178.34	3.34117e+08	0.608625	410.41	0.223836	-1.55648	-3.58703	-5.77505	-7.85206	-9.98665	-28.499	-14.4401	14.8115	29.9347
218	5183.14	1.00248e+10	-1.08201	449.847	0.429435	-1.75932	-3.59022	-5.38948	-7.08189	-8.734	-28.1799	-14.3318	14.7493	29.8243
219	5116.56	3.1424e+08	0.115692	440.938	0	-2.08235	-4.15456	-6.61218	-8.84831	-11.1597	-28.8262	-14.6633	15.0708	30.4557
220	5192.06	9.46649e+09	-1.18783	450.804	0.447229	-1.74965	-3.57065	-5.35144	-7.02387	-8.65282	-28.1888	-14.3373	14.7574	29.8423
221	5145.3	2.89122e+09	-0.70445	486.466	0.961779	-1.31799	-2.72155	-4.03987	-5.27395	-6.41407	-27.1563	-13.782	14.1473	28.5576
222	5189.8	2.05351e+08	-0.547198	449.189	0	-2.17737	-4.54893	-6.81965	-9.11945	-11.4991	-29.1134	-14.794	15.1494	30.6993
223	5146.15	2.40902e+09	-0.846073	493.869	1.15409	-1.16179	-2.45337	-3.62441	-4.69719	-5.65988	-26.8941	-13.6486	14.0081	28.2625
224	5139.82	2.9561e+08	-0.0430172	495.159	0	-2.58031	-4.79506	-7.23675	-9.49976	-11.7964	-29.2434	-14.8505	15.2033	30.6613
225	5243.53	1.25342e+09	-1.52076	506.561	2.21812	-0.391504	-1.03496	-1.35733	-1.60798	-1.65296	-25.5492	-12.9353	13.2588	26.7456
226	5195.81	3.79064e+08	-1.20162	511.604	0.611682	-1.6996	-3.65558	-5.41042	-7.32681	-9.01804	-27.9065	-14.1532	14.4473	29.133
227	5258.78	5.38861e+08	-1.53182	497.093	1.35951	-0.628906	-1.86732	-2.85104	-3.81732	-4.53961	-26.5117	-13.4383	13.7786	27.7885
228	5222.33	4.57806e+09	-1.77199	445.562	0.0890903	-2.11668	-4.31	-6.52251	-8.53785	-10.5669	-28.9289	-14.725	15.1529	30.6579
229	5249.6	1.41017e+09	-1.7528	415.693	0.0119291	-2.52889	-4.84775	-7.05544	-9.27576	-11.4375	-29.7297	-15.1431	15.5863	31.5479
230	5266.29	5.3609e+08	-1.80223	410.566	0	-2.53955	-4.82417	-7.08784	-9.40927	-11.5458	-29.8538	-15.2148	15.6527	31.6477
231	5256.09	7.0943e+08	-1.54374	417.447	0.00405501	-2.63996	-5.01308	-7.26759	-9.47463	-11.7205	-29.9349	-15.2474	15.7193	31.8462
232	5226.5	2.96033e+09	-1.88943	460.665	0.128359	-1.98211	-4.14905	-6.39859	-8.34956	-10.3424	-28.7243	-14.6224	15.0527	30.453
233	5380.9	4.6247e+08	-2.66223	442.548	0.224266	-2.07902	-4.38778	-6.61395	-8.66155	-10.4645	-29.0119	-14.7835	15.2177	30.8562
234	5224.9	1.45252e+09	-1.83028	473.348	0.15219	-1.88623	-4.02117	-6.21558	-8.13828	-10.0714	-28.5174	-14.5088	14.9156	30.1507
235	5221.89	1.93744e+08	-2.36225	468.445	0.0117987	-2.622	-4.84853	-7.26871	-9.63688	-11.7083	-29.2316	-14.8686	15.2102	30.7522
236	5210.66	7.77908e+08	-1.73077	481.669	0.199022	-1.70781	-3.73402	-5.88926	-7.72773	-9.61709	-28.2603	-14.3692	14.7668	29.8406
237	5049.74	5.52336e+10	-1.68633	408.392	1.66726	0.0912943	0.247252	0.583408	0.779072	1.09125	-26.3766	-13.5013	14.0247	28.5217
238	4800.91	1.58716e+09	1.80383	436.942	0.0938516	-2.05057	-4.10649	-6.12122	-8.09537	-10.0539	-27.6926	-14.0446	14.4041	29.0672
239	5071.47	5.25155e+10	-1.94303	408.342	1.75072	0.207711	0.482657	0.945674	1.25767	1.69093	-26.3345	-13.4884	14.0235	28.5332
240	5140.5	1.75274e+09	-1.32865	363.386	0.097616	-1.20227	-3.34276	-5.0184	-6.91764	-8.99271	-28.5147	-14.5104	14.9129	30.2515
241	5075.96	4.87417e+10	-2.08477	411.047	1.85491	0.301908	0.720641	1.32007	1.76029	2.33408	-26.2849	-13.4748	14.0264	28.5531
242	5102.07	5.77554e+08	-0.505873	369.636	1.10513	-0.703978	-1.25839	-1.62563	-2.24493	-2.52381	-28.7193	-14.8308	15.6031	32.0204
243	5086.88	4.59106e+10	-2.2484	414.911	1.94388	0.375648	0.88405	1.56711	2.08466	2.74019	-26.2821	-13.4768	14.0363	28.5772
244	5152.35	9.25085e+08	-2.29218	425.249	0.00425108	-3.09688	-5.35512	-6.38806	-7.1993	-8.79882	-31.3772	-16.1462	16.8755	34.4507
245	5085.66	4.46489e+10	-2.25396	415.059	1.99723	0.448917	1.01649	1.73763	2.28724	2.99454	-26.1836	-13.4248	13.9807	28.4621
246	5252.07	6.23652e+09	-1.74664	462.286	1.84303	-0.0919654	-0.233304	-0.182763	0.148276	0.944976	-27.1438	-13.9698	14.5916	29.7323
247	4861.01	3.07022e+08	-0.192792	497.759	0	-2.14707	-3.78387	-4.74975	-6.42061	-8.5356	-29.9924	-15.3237	15.9527	32.4903
248	5309.21	5.49602e+09	-2.09028	459.783	2.09135	0.0671083	0.134781	0.383635	1.00636	2.14598	-26.8927	-13.8581	14.4885	29.513
249	5136.28	1.05906e+09	-1.28473	454.194	1.15802	-1.93813	-3.55488	-2.97714	-2.83844	-3.40887	-29.0505	-15.0008	15.6596	31.9058
250	5378.29	4.24522e+09	-2.4777	459.782	2.41865	0.555406	1.06779	1.33393	2.19237	3.82438	-26.3803	-13.5918	14.2188	28.9668
251	5333.33	1.1796e+09	-2.18994	499.337	4.57298	1.62965	3.11509	5.23201	8.62379	12.2744	-23.43	-12.068	12.5803	25.4829
252	5446.86	2.74086e+09	-3.01536	438.927	1.77804	0.11777	0.208522	-0.378003	-0.753457	0.180637	-27.8359	-14.3412	15.0346	30.7172
253	5190.05	4.03518e+08	-1.31927	457.765	0.147153	-3.06704	-6.36912	-7.42558	-8.78231	-10.9146	-31.7279	-16.2525	16.8897	34.5522
254	5532.41	2.12504e+09	-3.65212	431.571	2.26536	0.923871	1.63887	1.18373	1.17054	2.86556	-27.026	-13.9501	14.6643	29.9694
255	5073.78	3.59395e+10	-2.50143	406.27	2.16141	0.639597	1.47845	2.44988	3.2605	4.09182	-25.9046	-13.2674	13.8044	28.0994
256	4881.64	5.55385e+08	-0.0091568	451.06	0	-2.61425	-5.33495	-7.78603	-10.8358	-14.0795	-29.2548	-15.0017	15.446	31.4434
257	5078.01	3.51995e+10	-2.55865	405.341	2.20685	0.701466	1.60887	2.64962	3.53499	4.44576	-25.8802	-13.256	13.7972	28.0871
258	5189.48	8.60576e+08	-2.3529	611.407	0.221612	-1.04733	-1.65305	-3.24343	-5.19993	-7.1398	-27.0532	-13.7856	14.2346	28.8139
259	5080.26	3.30712e+10	-2.64156	396.215	2.32193	0.894827	1.99354	3.24629	4.3683	5.54342	-25.7721	-13.2064	13.7601	28.0272
260	5326.42	1.47682e+09	-2.92808	621.79	7.11611	1.86645	5.07814	9.02756	12.369	15.8552	-24.3008	-12.3831	12.6107	25.6454
261	5074.25	3.11164e+10	-2.69152	383.943	2.13007	0.846099	1.78012	2.82249	3.78936	4.78913	-25.9014	-13.282	13.8731	28.2648
262	5130.5	1.33036e+09	-0.898253	498.393	3.71887	0.846435	2.10939	4.68767	7.44036	10.689	-24.2529	-12.5165	13.2564	26.9642
263	5079.48	2.88228e+10	-2.87376	375.579	2.12792	0.978998	1.96962	3.02389	3.95771	4.93383	-25.8852	-13.2732	13.8533	28.2323
264	5030.64	4.60009e+09	-1.35162	405.519	0.674963	-1.85224	-3.71885	-4.71745	-5.55938	-6.563	-29.5982	-15.224	15.8888	32.4577
265	5085.56	1.0541e+09	-1.02675	452.619	0.322284	-2.66629	-5.10406	-6.86571	-7.96989	-9.45659	-30.0225	-15.4335	15.999	32.7908
266	5070.91	2.84063e+09	-2.02817	376.023	0.973435	-1.22682	-2.61915	-3.19042	-3.71782	-4.21907	-29.4175	-15.155	15.8544	32.3439
267	5283.08	4.10111e+08	-3.52283	373.545	0.0700515	-2.93359	-5.51014	-8.19775	-11.2484	-13.8704	-32.7841	-16.8695	17.8439	36.6738
268	5075.19	1.79509e+09	-2.23363	362.678	1.5244	-0.459673	-0.83118	-0.651815	-0.246635	0.202426	-28.1148	-14.5033	15.1231	30.8057
269	5446.85	2.41963e+08	-4.31256	366.414	6.18544	5.1084	9.67502	14.232	18.9997	24.3169	-19.6837	-10.1883	10.7439	21.9209
270	5014.03	9.49393e+08	-1.99451	351.204	0.991947	-1.63388	-2.29951	-2.75292	-3.2382	-3.7843	-29.7761	-15.4048	15.9771	32.5418
271	4831.75	1.91241e+08	-0.963673	341.845	0	-4.14854	-5.9664	-7.88821	-10.2931	-12.5836	-33.2011	-17.2336	18.0407	36.5857
272	5425.48	2.54599e+08	-4.6602	356.942	3.61158	3.42167	6.01447	7.92915	10.4263	13.0937	-24.4962	-12.684	13.1195	26.7781
273	5100.11	2.34124e+10	-3.32274	366.919	2.48704	1.59785	3.20759	4.71414	6.05684	7.49356	-25.1775	-12.9017	13.4642	27.4334
274	4891.97	1.87531e+08	-0.396735	441.503	0	-1.78128	-4.139	-6.41345	-8.03261	-9.97544	-30.8002	-15.7771	16.4352	33.5538
275	5123.72	2.15009e+10	-3.62265	357.55	2.65394	1.87624	3.85728	5.58812	7.18823	8.87741	-24.8299	-12.7214	13.2783	27.0613
276	5064.76	3.38716e+09	-3.04199	464.146	1.26828	-0.690578	-1.27266	-1.69333	-2.0529	-2.56461	-27.6859	-14.1199	14.6461	29.735
277	4986.51	1.10545e+09	-2.61459	436.342	0.952921	-0.752612	-1.8771	-2.39685	-3.50971	-4.762	-27.2117	-13.9003	14.34	29.1489
278	5214.81	1.78944e+09	-3.99453	487.18	1.81201	-0.353859	-0.398536	-0.60413	-0.437746	-0.341421	-27.7493	-14.1386	14.7246	29.8769
279	5268.23	1.83279e+08	-5.24164	476.476	0.297411	-2.02679	-2.79256	-4.77168	-5.72018	-7.5448	-30.3951	-15.4464	16.5168	33.7567
280	5378.54	1.00285e+09	-4.9868	506.585	3.14093	0.535495	1.99323	2.62809	4.37317	5.34665	-26.7318	-13.6441	14.2556	28.9069
281	5142.34	1.69448e+10	-3.84801	327.029	3.01536	3.00284	5.88528	8.52886	10.8977	13.3283	-23.6317	-12.1209	12.6965	25.9115
282	5137	4.53124e+09	-3.00245	338.134	0.900554	-0.526563	-1.06136	-1.50897	-2.32275	-3.00521	-29.0196	-14.9339	15.6765	32.0591
283	4724.16	3.18929e+08	-1.12914	313.495	0	-2.13807	-4.1922	-4.97513	-7.14124	-8.76983	-30.79	-15.8373	16.5904	34.1612
284	5231.85	3.64804e+09	-3.51352	333.04	1.11858	-0.0802624	-0.293648	-0.435585	-0.939059	-1.48357	-28.7794	-14.8218	15.5872	31.8617
285	5184.33	2.83492e+08	-3.37081	318.386	2.48698	1.59033	3.07284	4.24973	6.55388	7.80502	-25.5062	-13.1739	13.9174	28.2647
286	5383.37	2.5186e+09	-4.33804	340.327	1.34026	0.477754	0.551569	0.54363	0.295896	0.111645	-28.7258	-14.8075	15.5556	31.8323
287	5444.1	2.48484e+08	-4.86617	325.598	0.0284386	0.213202	-1.84857	-5.16431	-8.89245	-11.1848	-35.5842	-18.52	19.7232	40.4136
288	5572.64	9.14093e+08	-5.25927	356.243	2.33266	1.79561	3.98962	5.84344	6.74778	7.99432	-26.8754	-13.8231	14.5274	29.8792
289	5150.47	1.2208e+10	-4.22452	321.099	3.85109	4.10387	8.05284	11.6664	15.0174	18.4134	-21.9981	-11.2701	11.7995	24.0652
290	5047.18	2.464e+09	-3.66023	423.383	7.48823	4.2891	8.37425	12.9624	18.0434	24.1018	-19.9554	-10.1235	10.5295	21.5137
291	5197.55	9.39851e+09	-4.52981	291.677	3.03912	4.26084	8.40678	11.7747	14.4792	16.7721	-22.8063	-11.7383	12.3368	25.1535
292	5411.31	2.29194e+09	-5.32869	302.459	3.40852	5.41162	10.2625	14.7041	18.0339	20.9009	-23.2033	-12.0067	12.7125	26.0134
293	5155.08	6.74672e+09	-4.48317	286.352	3.07572	4.20985	8.41107	11.7287	14.4488	16.7646	-22.5197	-11.5778	12.1606	24.7764
294	5099.69	9.83826e+08	-4.72443	308.698	10.1514	8.2083	16.9134	24.9688	32.5517	40.5192	-15.1409	-7.77522	8.08104	16.3335
295	5247.97	4.20413e+09	-4.98687	274.647	2.52827	4.10813	8.29087	11.4191	13.3391	14.5159	-23.3254	-11.9971	12.6942	25.9104
296	5421.29	1.81437e+09	-5.9069	288.446	1.87209	3.82949	8.24736	12.2512	14.4084	14.0797	-25.8051	-13.3565	14.2345	29.2391
297	5158.42	1.94831e+09	-4.66754	258.513	3.7122	5.40319	10.7405	14.2771	16.8517	19.6133	-20.6166	-10.5775	11.1572	22.6356
