# Supplementary material for: Glaciers determine the sensitivity of hydrological processes to perturbed climate in a large mountainous basin on the Tibetan Plateau
Source: Copernicus journal article supplement (doi:10.5194/hess-28-669-2024), 2024-02-15
Supplement: Supplementary file 2 [file hess-28-669-2024-supplement.zip]

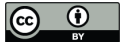

*Supplement of*

**Glaciers determine the sensitivity of hydrological processes to perturbed climate in a large mountainous basin on the Tibetan Plateau**

**Yi Nan and Fuqiang Tian**

*Correspondence to:* Fuqiang Tian ([tianfq@tsinghua.edu.cn](mailto:tianfq@tsinghua.edu.cn))

- [hess-28-669-2024-supplement-title-page.pdf](#)
- [Supplementary Figures.pdf](#)
- [Supplementary Tables.xlsx](#)

The copyright of individual parts of the supplement might differ from the article licence.
