# Supplementary material for: Glaciers determine the sensitivity of hydrological processes to perturbed climate in a large mountainous basin on the Tibetan Plateau
Source: Copernicus journal article supplement (doi:10.5194/hess-28-669-2024), 2024-02-15
Supplement: Supplementary file 3 [file hess-28-669-2024-supplement.zip]

Archive with 3 entries (3 files):
- Supplementary Tables.xlsx
- Supplementary Figures.pdf
- hess-28-669-2024-supplement-title-page.pdf
